# Supplementary material
Source: PubMed Central journal article supplement (PMC2688863)
Supplement: 0812808106_0812808106SI.pdf [file 0812808106_0812808106SI.pdf]

# Supporting Information

## Macomber and Imlay 10.1073/pnas.0812808106

### SI Methods

**Strain Constructions.** Mutations were introduced into strains by P1 transduction and selected with the appropriate antibiotic.  $\lambda$ (*copA-lacZ*) lysogens in W3110 (WT) were selected for kanamycin resistance.  $\lambda$ (*copA-lacZ*) lysogens in LEM33 (*copA::kan cueO cusCFBA*) were picked from turbid plaques. The lysogen copy number was tested by PCR analysis (1).

**In Vivo Repair of Fumarase A.** W3110 (WT) were grown aerobically in glucose/alanine medium to an OD<sub>500</sub> of  $\approx 0.1$  and then exposed to 80  $\mu$ M copper for 1 h. Chloramphenicol (150  $\mu$ g/mL) was then added, and cells were centrifuged, washed twice, and resuspended, all in medium containing chloramphenicol. The resuspended culture was incubated at 37 °C aerobically, and at intervals aliquots were removed for assay of fumarase activity.

**EPR Analysis.** Fumarase A (4  $\mu$ M) was inactivated to 15% of its initial activity by a 3-min exposure to 30  $\mu$ M Cu(I). EPR signals were measured with a Varian Century E-112 X-band spectrophotometer equipped with a Varian TE102 cavity and temperature controller. The spectra were measured at temperatures of

5, 8, and 15 K with the following settings: field center, 2,500 G; field sweep, 5,000 G; modulation frequency, 100 kHz; modulation amplitude, 8 G; time constant, 0.032; receiver gain, 12,500; and power, 1 mW. In control experiments, 4  $\mu$ M fumarase A was exposed to 10  $\mu$ M H<sub>2</sub>O<sub>2</sub> for 3 min, which led to a 99% inactivation of the enzyme and a large [<sup>3</sup>Fe-<sup>4</sup>S]<sup>+</sup> signal. The subsequent addition of 100  $\mu$ M dithionite, but not of ascorbate (350  $\mu$ M), silenced the EPR signal by reducing the cluster to [<sup>3</sup>Fe-<sup>4</sup>S]<sup>0</sup>. Unfortunately, the further addition of 1 mM hydrogen peroxide failed to regenerate the [<sup>3</sup>Fe-<sup>4</sup>S]<sup>+</sup> EPR signal (data not shown), and addition of 1 mM ferricyanide regenerated only a small fraction of the original signal (data not shown). Therefore, we were unable to definitively test for the presence of a [<sup>3</sup>Fe-<sup>4</sup>S]<sup>0</sup> cluster in copper-treated enzyme by this method.

**Succinate Dehydrogenase Assay.** Cells were lysed using a French press. Membrane vesicles were isolated by centrifugation at 100,000  $\times g$  for 2 h at 4 °C. Succinate dehydrogenase activity was determined by measuring succinate-dependent (4 mM) oxygen consumption. The oxygen concentration was measured using an oxygen-electrode (model 10 digital oxygen system; Micrometrix).

1. Powell BS, Rivas MP, Court DL, Nakamura Y, Turnbough CL Jr (1994) Rapid confirmation of single copy lambda prophage integration by PCR. *Nucleic Acids Res* 22:5765–5766.
2. Neidhardt FC (1996) *Escherichia coli and Salmonella: Cellular and Molecular Biology* (ASM Press, Washington, DC), 2nd Ed, pp 2460–2488.
3. Seaver LC, Imlay JA (2001) Alkyl hydroperoxide reductase is the primary scavenger of endogenous hydrogen peroxide in *Escherichia coli*. *J Bacteriol* 183:7173–7181.
4. Macomber L, Rensing C, Imlay JA (2007) Intracellular copper does not catalyze the formation of oxidative DNA damage in *Escherichia coli*. *J Bacteriol* 189:1616–1626.
5. Jang S, Imlay JA (2007) Micromolar intracellular hydrogen peroxide disrupts metabolism by damaging iron-sulfur enzymes. *J Biol Chem* 282:929–937.
6. Bolivar F, et al. (1977) Construction and characterization of new cloning vehicles. II. A multipurpose cloning system. *Gene* 2:95–113.
7. Sambrook J, Russell DW (2001) *Molecular Cloning: A Laboratory Manual* (Cold Spring Harbor Lab Press, Cold Spring Harbor, NY), 3rd Ed.
8. Lee EC, Gumport RI, Gardner JF (1990) Genetic analysis of bacteriophage lambda integrase interactions with arm-type attachment site sequences. *J Bacteriol* 172:1529–1538.
9. Woods SA, Schwartzbach SD, Guest JR (1988) Two biochemically distinct classes of fumarase in *Escherichia coli*. *Biochim Biophys Acta* 954:14–26.
10. Wu JY, Siegel LM, Kredich NM (1991) High-level expression of *Escherichia coli* NADPH-sulfite reductase: requirement for a cloned *cysG* plasmid to overcome limiting siroheme cofactor. *J Bacteriol* 173:325–333.
11. Natvig DO, Imlay K, Touati D, Hallewell RA (1987) Human copper-zinc superoxide dismutase complements superoxide dismutase-deficient *Escherichia coli* mutants. *J Biol Chem* 262:14697–14701.
12. Wang RF, Kushner SR (1991) Construction of versatile low-copy-number vectors for cloning, sequencing and gene expression in *Escherichia coli*. *Gene* 100:195–199.
13. Outten FW, Huffman DL, Hale JA, O'Halloran TV (2001) The independent *cue* and *cus* systems confer copper tolerance during aerobic and anaerobic growth in *Escherichia coli*. *J Biol Chem* 276:30670–30677.

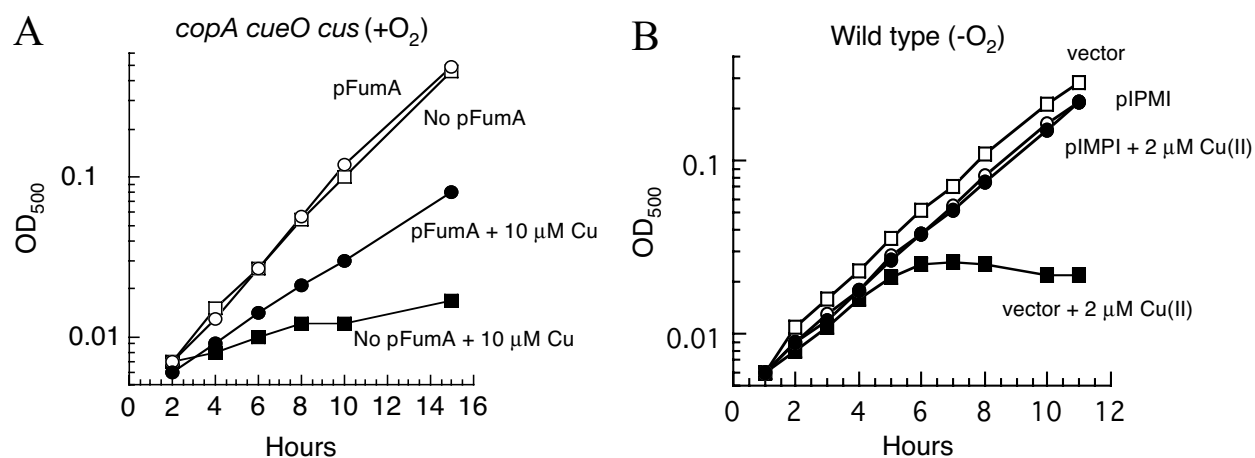

**Fig. S1.** The overexpression of dehydratases restores growth in the presence of copper. (A) Lem33 (*copA cueO cusCFBA*) cells containing pG597 (fumarase A expressed from its own promoter; circles) or cells with normal levels of fumarase A (squares) were grown aerobically at 37 °C in succinate/ILV medium and supplemented with 0 μM (open symbols) or 10 μM CuSO<sub>4</sub> (closed symbols). (B) W3110 (WT) cells containing pLEUCD2 (overexpressing IPMI; circles) or the vector alone (squares) were grown anaerobically at 37 °C in lactose/alanine medium and supplemented with 0 μM (open symbols) or 2 μM CuSO<sub>4</sub> (closed symbols). The data are representative of 3 independent experiments.



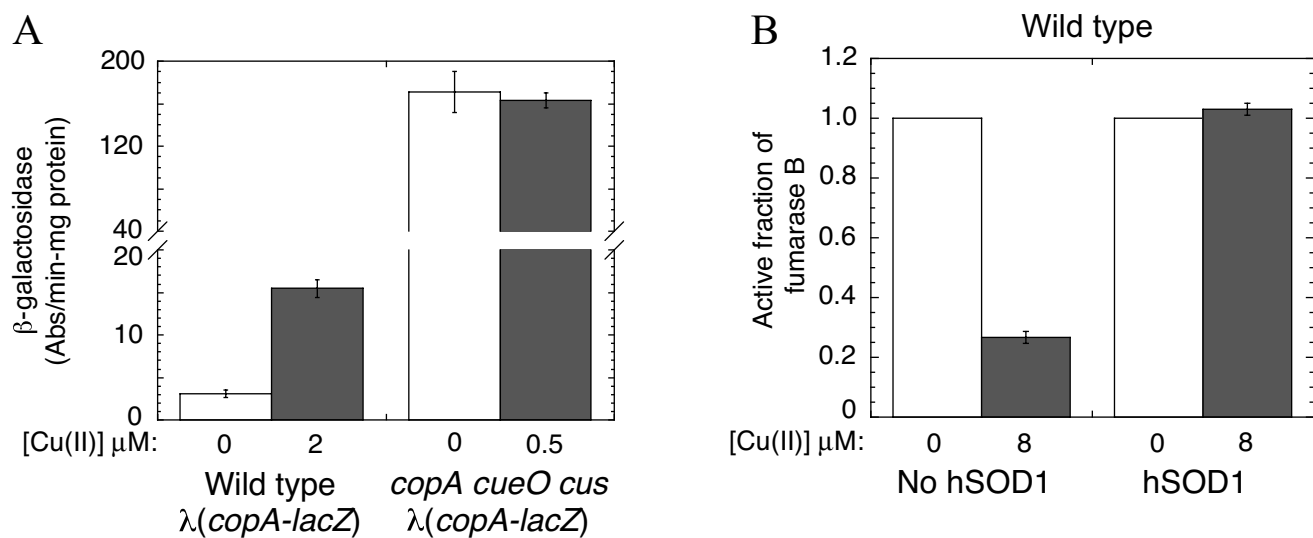

**Fig. S3.** Excess copper is sensed by cytoplasmic CueR, and a heterologous cytoplasmic copper-binding protein protects dehydratases from copper-dependent damage. (A) LEM179 [ $\lambda(\text{copA-lacZ})$ ] and LEM180 [*copA cueO cus*  $\lambda(\text{copA-lacZ})$ ] were grown anaerobically in glucose/ILV medium at 37 °C to an  $\text{OD}_{500} \approx 0.1$ . Cultures were then challenged with (gray bars) or without copper (white bars) for 1 h. (B) W3110 (WT) with or without pNco5A (human Cu, ZnSOD, or hSOD1) was grown anaerobically in glucose/alanine medium to an  $\text{OD}_{500}$  of  $\approx 0.1$ , and then 1 mM IPTG was added to induce hSOD1 expression for 1 h. Cultures were then challenged with 0  $\mu\text{M}$  (open bars) or 8  $\mu\text{M}$   $\text{CuSO}_4$  (gray bars) for 30 min. The data are the averages of 3 independent experiments, and the error bars represent SD.

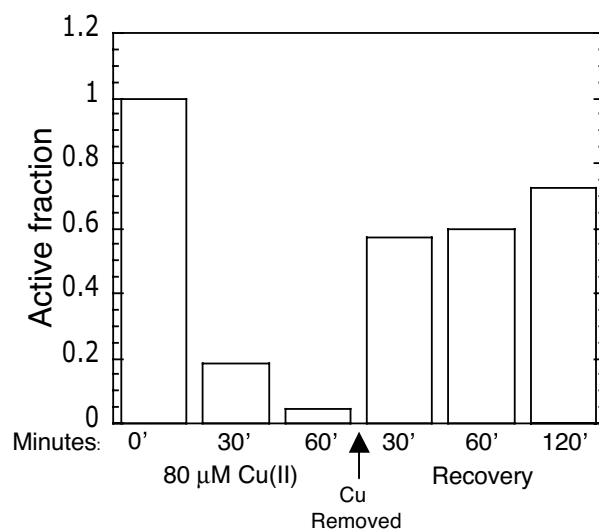

**Fig. S4.** Copper-damaged fumarase is repaired in vivo. W3110 (WT) cells were grown aerobically at 37 °C in glucose/alanine medium to an OD<sub>500</sub> of ≈0.1 and then challenged with 80 μM CuSO<sub>4</sub>. After 60 min, chloramphenicol (150 μg/mL) was added to stop protein synthesis, and the copper was removed by washing. Cells were resuspended in medium supplemented with chloramphenicol and incubated aerobically. The fumarase activities were measured as described. The data are representative of 3 independent experiments.

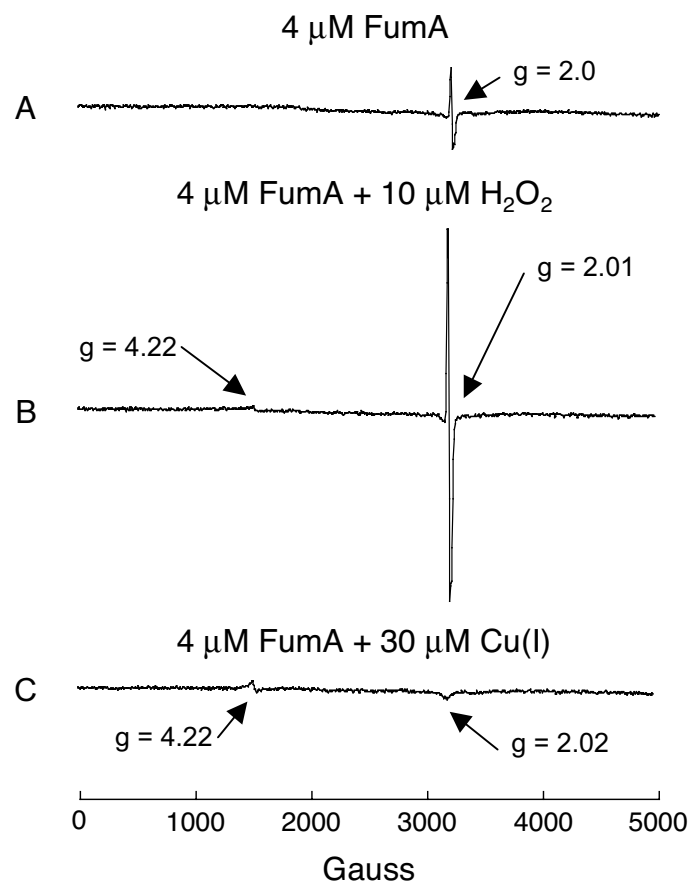

**Fig. S5.** Copper-damaged fumarase A did not present an EPR spectrum. (A) Fumarase A (4 μM) in 50 mM Tris-HCl/10 mM  $MgCl_2$ , pH 8, contains a small  $[^3Fe-^4S]^+$  iron-sulfur cluster signal at  $g = 2.0$ . (B) Fumarase A (4 μM) treated anaerobically at 27 °C with 10 μM  $H_2O_2$  for 3 min contains a  $[^3Fe-^4S]^+$  iron-sulfur cluster signal at  $g = 2.01$  and a weak free-iron signal at  $g = 4.22$ . (C) Fumarase A (4 μM) treated anaerobically at 27 °C with 30 μM Cu(I) for 3 min contains a weak signal at  $g = 2.02$  and a free-iron signal at  $g = 4.22$ . The data were collected at a temperature of 8 K and are representative of 3 independent experiments.

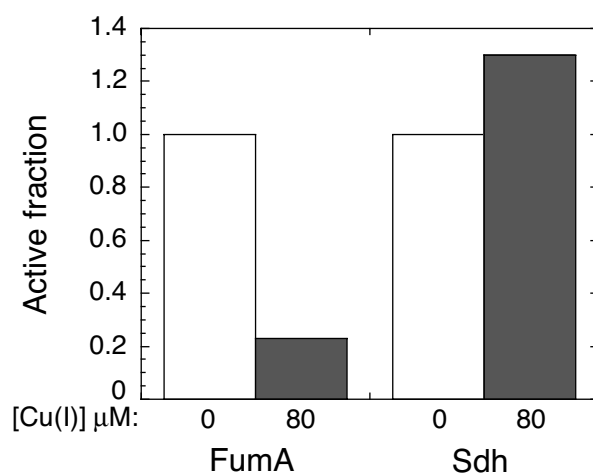

**Fig. S6.** Copper does not damage succinate dehydrogenase. Fumarase A was mixed with membrane vesicles containing succinate dehydrogenase (*Sdh*), and the enzyme mixture was then challenged anaerobically with 0  $\mu M$  (open bars) or 80  $\mu M$  Cu(I) (gray bars) for 3 min at 27 °C. Neocuproine (100  $\mu M$ ) was added to the samples to chelate copper before measuring enzyme activities. The data are representative of 3 independent experiments.

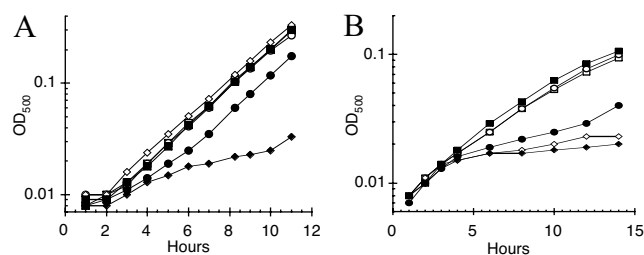

**Fig. S7.** Glutathione and the Suf iron-sulfur cluster assembly system contribute to copper resistance in vivo. (A) W3110 (WT; open symbols) and LEM122 (*gshA*; closed symbols) cells were grown anaerobically at 37 °C in glucose/alanine medium in the presence of 0 μM (squares), 0.5 μM (circles), or 1 μM CuSO<sub>4</sub> (diamonds). (B) W3110 (WT) (open symbols) and LEM146 (*sufABCDE*; closed symbols) cells were grown anaerobically at 37 °C in glycerol/nitrate/ILV medium in the presence of 0 μM (squares), 1 μM (circles), or 2 μM CuSO<sub>4</sub> (diamonds). The data are representative of 3 independent experiments.

## Strains, plasmids, and phage

| Strains               | Genotype                                                                                                                    | Source (SI ref. no.) |
|-----------------------|-----------------------------------------------------------------------------------------------------------------------------|----------------------|
| AB1157                | F <sup>-</sup> λ <sup>-</sup> <i>thr-1 leuB6 proA2 his-4 thi-1 argE2 lacY1 galK2 rpsL supE44 ara-14 xyl-15 mtl-1 tsx-33</i> | 2                    |
| CSH7                  | <i>lacY rpsL thi-1</i>                                                                                                      | 2                    |
| JI360                 | As MG1655 plus <i>katE12::Tn10</i>                                                                                          | 3                    |
| JI364                 | As MG1655 plus Δ( <i>katG17::Tn10</i> )1                                                                                    | 3                    |
| JS126                 | As CSH7 plus Δ <i>ahpCF1::cat</i>                                                                                           | Lab strain           |
| LEM33                 | As W3110 plus <i>copA::kan ΔcueO ΔcusCFBA</i>                                                                               | 4                    |
| LEM122                | As W3110 plus <i>gshA::kan srlC300::Tn10</i>                                                                                | 4                    |
| LEM133                | As W3110 plus <i>copA::kan ΔcueO ΔcusCFBA ΔahpCF1::cat Δ(katG17::Tn10)1 Δ(katE12::Tn10)1</i>                                | Present study        |
| LEM146                | As W3110 plus Δ <i>sufABCDSE::kan~zdi57::Tn10</i>                                                                           | Present study        |
| LEM179                | As W3110 plus λ( <i>copA-lacZ</i> )                                                                                         | Present study        |
| LEM180                | As W3110 plus λ( <i>copA-lacZ</i> ) <i>copA::kan ΔcueO ΔcusCFBA</i>                                                         | Present study        |
| MG1655                | F <sup>-</sup> λ <sup>-</sup> WT                                                                                            | 2                    |
| OD500                 | As MG1655 plus Δ <i>sufABCDSE19::kan~zdi57::Tn10</i>                                                                        | Lab strain           |
| PD401                 | As AB1157 plus <i>srlC300::Tn10 cysJ93</i>                                                                                  | Lab strain           |
| SJ50                  | As MG1655 plus Δ( <i>katG17::Tn10</i> )1 Δ( <i>katE12::Tn10</i> )1 Δ( <i>ahpC-ahpF</i> ) <i>kan::'ahpF ΔfumAC ΔfumB::cm</i> | 5                    |
| W3110                 | F <sup>-</sup> λ <sup>-</sup> IN(rrnD-rrnE)1 rph-1 WT                                                                       | 2                    |
| <b>Plasmids</b>       |                                                                                                                             |                      |
| pBR322                | Cloning vector                                                                                                              | 6, 7                 |
| pCKR101               | P <sub>lac</sub> -lacI <sup>q</sup> P <sub>tac</sub> polylinker Am <sup>r</sup>                                             | 8                    |
| pFumA                 | As pCKR101 plus <i>fumA</i>                                                                                                 | 5                    |
| pGS97                 | As pBR322 plus <i>fumA</i> under its own promoter                                                                           | 9                    |
| pJRS102               | As pBR322 plus <i>cysJ1H cysG</i>                                                                                           | 10                   |
| pLEUCD2               | As pWKS30 plus <i>leuCD</i> insert                                                                                          | 5                    |
| pNco5A                | As pBR322 plus pcHSOD1                                                                                                      | 11                   |
| pWKS30                | P <sub>lac</sub> polylinker Am <sup>r</sup>                                                                                 | 12                   |
| <b>Phage</b>          |                                                                                                                             |                      |
| λ( <i>copA-lacZ</i> ) | ( <i>copA-lacZ</i> ) kan <sup>r</sup>                                                                                       | 13                   |
